# Supplementary material for: Inhibition of lncRNA DILC attenuates neuropathic pain via the SOCS3/JAK2/STAT3 pathway
Source: PubMed Central journal article supplement (PMC7300282; doi:10.1042/bsr20194486), 2020-06-17
Supplement: BSR-2019-4486_supp.pdf [file BSR-2019-4486_supp.pdf]

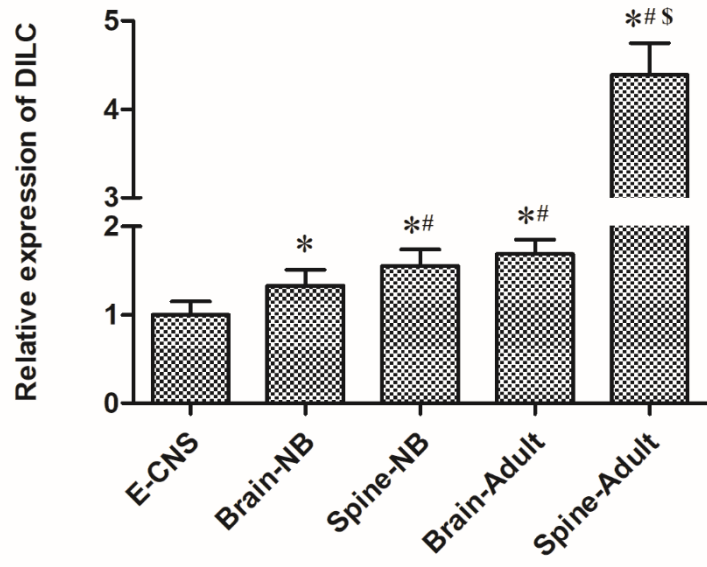

**Supplementary figure 1.** The expression pattern of lncRNA DILC in the rat CNS at different development stages. CNS: central nervous system; E: embryonic; NB: new born. E-CNS was sampled from the rat embryo at day 14 of gestation. Brain-NB and Spine-NB were sampled from neonatal rats less than 3 days old. Brain-NB and Spine-NB were sampled from 6-month-old rats. \* $P < 0.05$  vs. E-CNS; # $P < 0.05$  vs. Brain-NB; \$ $P < 0.05$  vs. Spine-NB.

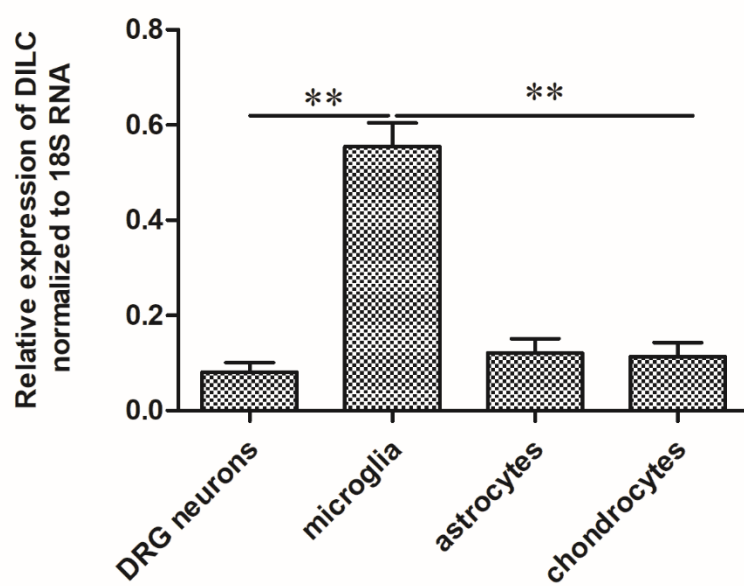

**Supplementary figure 2.** The expression pattern of lncRNA DILC in main cell types in adult rat spinal cord, including dorsal root ganglion (DRG) neurons, microglia, astrocytes and chondrocytes.  $**P < 0.01$ .
